# Supplementary material for: Detection of Novel Biomarkers in Saliva of Rheumatoid Arthritis Model Mice by Proteomics and Pathological Analysis
Source: Preprints.org preprint supplement (doi:10.20944/preprints202112.0453.v1), 2021-12-28
Supplement: Supplementary file 1 [file supplementary]

Supplemental Figure 1

The total length of the gel lane in Western blotting analysis

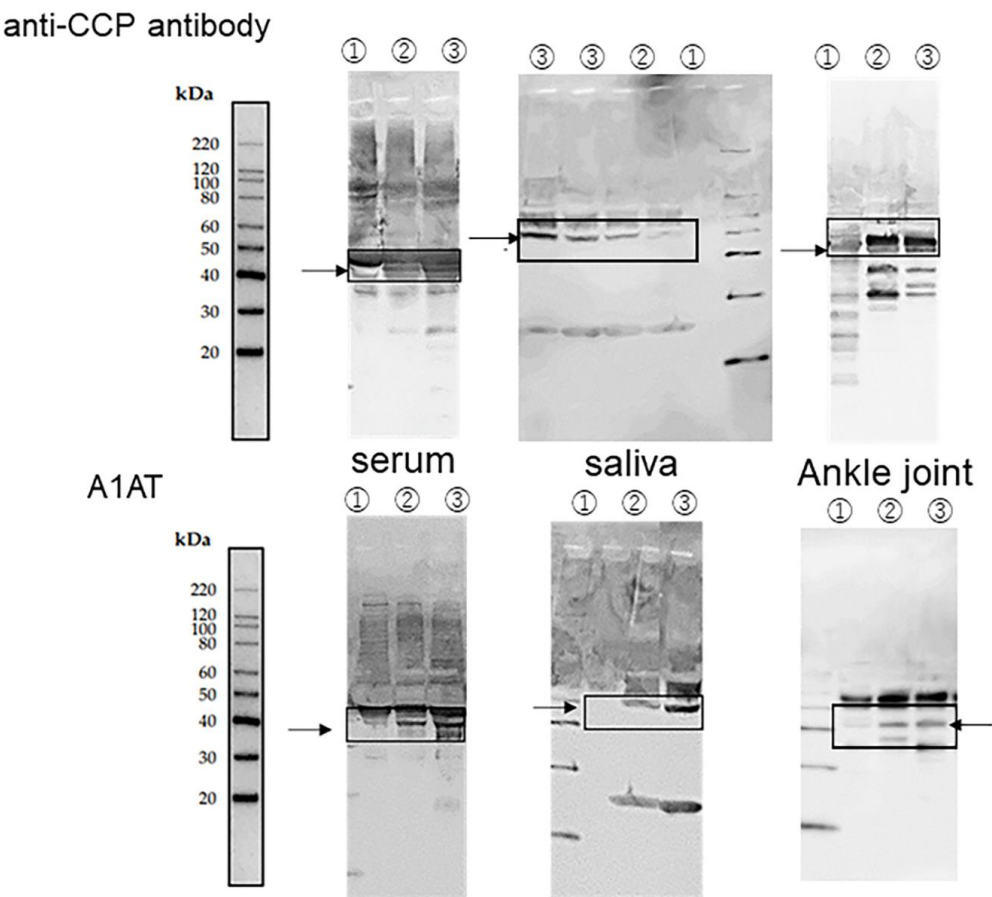

The total length of the gel lane in Western blotting analysis.

Some of the citrullinated proteins identified by proteome analysis.

[illegible]
